# Supplementary material
Source: MDPI journal article supplement (https://www.mdpi.com/2075-4701/13/4/810)

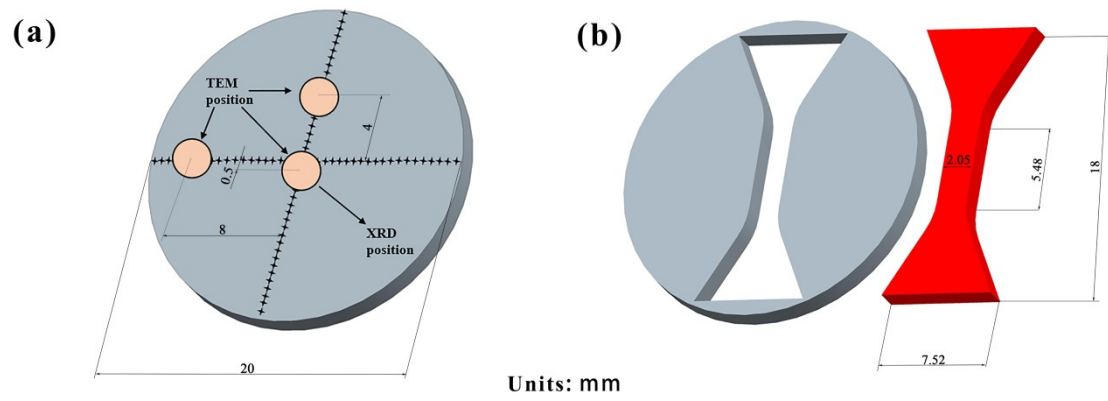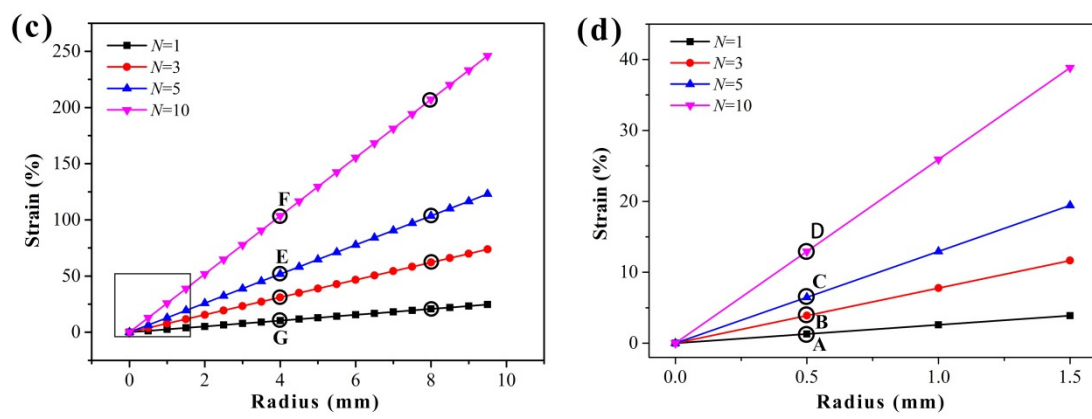

Figure 1

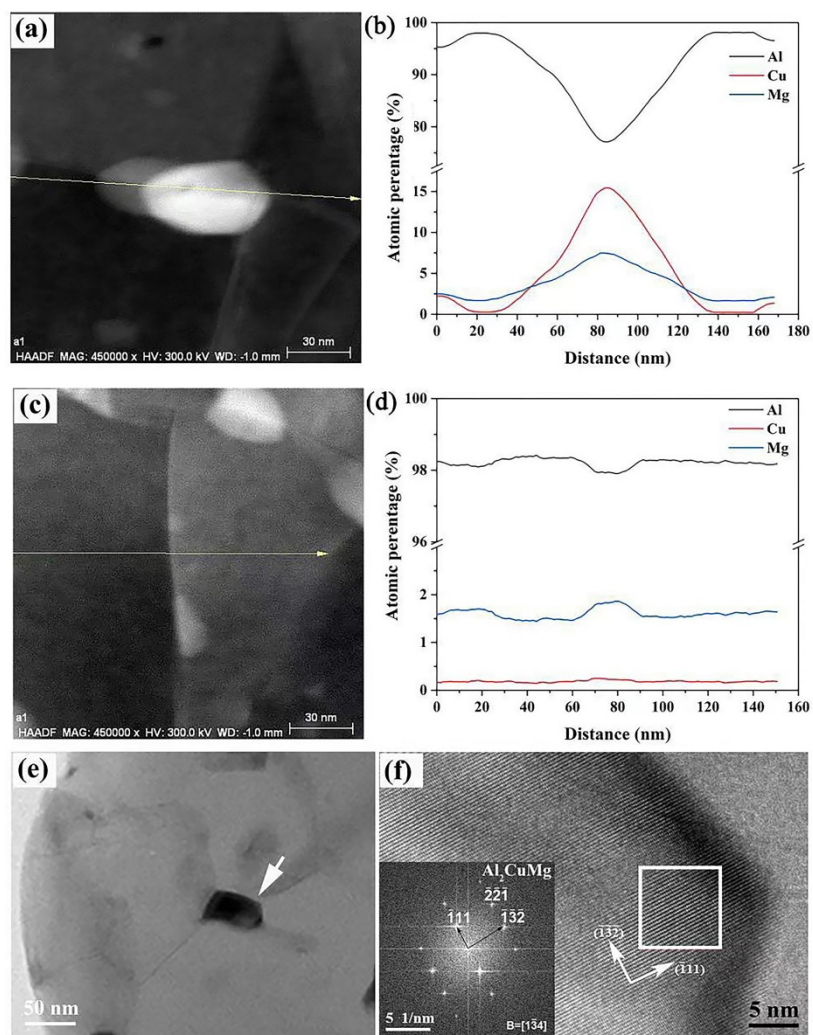

Figure 8

Supplement: s1 [file s1]
